# Supplementary material for: A feasibility trial of a digital mindfulness-based intervention to improve asthma-related quality of life for primary care patients with asthma
Source: Springer Nature journal article supplement (doi:10.1007/s10865-021-00249-3), 2021-08-27
Supplement: MOESM2 [file 19607162]

**Supplementary File 2. Baseline participant demographic information for participants who withdrew from the study or were lost to follow up and did not complete the primary endpoint (LTFU) at 6 weeks and 3 months.**

| <i>Measure</i>                               | <b>Final sample<br/>(N = 144)</b>                                                                                                                                     | <b>Withdrawn<br/>(N = 14)</b>                                                                           | <b>LTFU at 6 weeks<br/>(N = 20)</b>                                                                                                                                   | <b>LTFU at 3 months<br/>(N = 11)</b>                                                                                                                                  |
|----------------------------------------------|-----------------------------------------------------------------------------------------------------------------------------------------------------------------------|---------------------------------------------------------------------------------------------------------|-----------------------------------------------------------------------------------------------------------------------------------------------------------------------|-----------------------------------------------------------------------------------------------------------------------------------------------------------------------|
| Age: M (SD)*                                 | 51.1 (14.7)                                                                                                                                                           | 58.2 (10.9)                                                                                             | 43.2 (14.0)                                                                                                                                                           | 38.3 (14.4)                                                                                                                                                           |
| Ethnicity (%)                                | White (97%), Indian (3%)                                                                                                                                              | White (100%)                                                                                            | White (100%)                                                                                                                                                          | White (81%), Chinese (9%), other (1%)*                                                                                                                                |
| Education (%)                                | School (22%), Degree/Diploma (57%), Postgraduate (20%), Other (1%)                                                                                                    | School (40%), Diploma (20%), Degree (20%), Other (20%)                                                  | School (25%), Degree/Diploma (45%) Postgraduate (30%).                                                                                                                | School (27%), Degree/Diploma (55%), Postgraduate (18%).                                                                                                               |
| Weekly internet use: M hours (SD)            | 17.2 (14.3)                                                                                                                                                           | 15.1 (7.5)                                                                                              | 16.7 (14.4)                                                                                                                                                           | 26.3 (26.4)                                                                                                                                                           |
| Meditation experience (%)                    | Not heard of it/don't know about it (14%), never tried it (30%), tried other types of meditation (23%), tried mindfulness (25%), regularly practice mindfulness (7%). | Not heard of it/don't know about it (20%), never tried it (60%), tried other types of meditation (20%). | Not heard of it/don't know about it (10%), never tried it (35%), tried other types of meditation (30%), tried mindfulness (20%), regularly practice mindfulness (5%). | Not heard of it / don't know about it (18%), never tried it (54%), tried other types of meditation (9%), tried mindfulness (9%), regularly practice mindfulness (9%). |
| <i>Years since diagnosis</i>                 | 26.1 (15.9)                                                                                                                                                           | 19.2 (19.2)                                                                                             | 29.8 (18.1)                                                                                                                                                           | 23.4 (19.1)                                                                                                                                                           |
| <i>Asthma-related Quality of Life (AQLQ)</i> | 5.44 (1.0)                                                                                                                                                            | 5.72 (0.9)                                                                                              | 5.27 (1.1)                                                                                                                                                            | 5.24 (1.2)                                                                                                                                                            |
| <i>Symptoms subdomain</i>                    | 5.24 (1.2)                                                                                                                                                            | 5.45 (1.0)                                                                                              | 5.11 (1.2)                                                                                                                                                            | 4.87 (1.4)                                                                                                                                                            |
| <i>Environment subdomain</i>                 | 4.97 (1.3)                                                                                                                                                            | 5.30 (1.3)                                                                                              | 4.78 (1.3)                                                                                                                                                            | 4.80 (1.5)                                                                                                                                                            |
| <i>Emotions subdomain</i>                    | 5.44 (1.3)                                                                                                                                                            | 5.80 (1.0)                                                                                              | 5.22 (1.3)                                                                                                                                                            | 5.33 (1.3)                                                                                                                                                            |
| <i>Activities subdomain</i>                  | 5.91 (1.0)                                                                                                                                                            | 5.91 (1.0)                                                                                              | 5.80 (1.2)                                                                                                                                                            | 5.84 (1.0)                                                                                                                                                            |
| <i>Asthma Control (ACQ)</i>                  | 1.14 (0.9)                                                                                                                                                            | 1.02 (0.7)                                                                                              | 1.25 (0.9)                                                                                                                                                            | 1.37 (1.0)                                                                                                                                                            |
| <i>Anxiety (HADS-A)</i>                      | 7.72 (4.3)                                                                                                                                                            | 5.79 (3.8)                                                                                              | 8.58 (3.7)                                                                                                                                                            | 8.50 (4.3)                                                                                                                                                            |
| <i>Depression (HADS-D)</i>                   | 4.34 (3.7)                                                                                                                                                            | 4.00 (3.7)                                                                                              | 4.97 (3.7)                                                                                                                                                            | 3.93 (3.1)                                                                                                                                                            |
| <i>Mindful Awareness (PHLMS-Aw)</i>          | 30.7 (7.9)                                                                                                                                                            | 27.6 (6.6)                                                                                              | 30.1 (7.3)                                                                                                                                                            | 32.1 (7.3)                                                                                                                                                            |
| <i>Mindful Acceptance (PHLMS-Ac)</i>         | 34.7 (6.4)                                                                                                                                                            | 33.2 (3.6)                                                                                              | 35.3 (6.5)                                                                                                                                                            | 34.0 (7.5)                                                                                                                                                            |
| <i>Medication Adherence (MARS-A)</i>         | 37.9 (8.5)                                                                                                                                                            | 39.4 (9.0)                                                                                              | 38.2 (8.8)                                                                                                                                                            | 35.8 (7.9)                                                                                                                                                            |

**Note(s):** Some demographic questionnaires were not compulsory and the data reported is from all available participants. ACQ (lower scores equate to better control); AQLQ (higher scores equate to greater impairment); HADS (higher scores equate to more anxiety). PHLMS (two subscales of awareness and attention, in which higher scores equate to more mindfulness); MARS-A (higher scores equate to better adherence). \*Chi-square test could not be conducted due to insufficient cases in cells.
